# Supplementary material
Source: publisher figshare collection journal article supplement (https://diabetesjournals.figshare.com/ndownloader/files/38890812)

**Gastrointestinal Consequences of Type 2 Diabetes Mellitus and Impaired Glycemic Homeostasis: A Mendelian Randomization Study**

*Jie Chen, Shuai Yuan, Tian Fu, Xixian Ruan, Jie Qiao, Xiaoyan Wang, Xue Li, Dipender Gill, Stephen Burgess, Edward L Giovannucci, Susanna C. Larsson*

**Supplementary Table 1.** Information of included studies and consortia

**Supplementary Table 2.** Summary of the type 2 diabetes and glycemic trait instrument variables used in this study

**Supplementary Table 3.** SNPs used as instrumental variable for type 2 diabetes and glycemic traits

**Supplementary Table 4.** Definition of gastrointestinal diseases in the UK Biobank study and the FinnGen consortium

**Supplementary Table 5.** False discovery rate adjusted P values for all tested associations

**Supplementary Table 6.** Sensitivity analyses for the associations of genetic liability to type 2 diabetes with gastrointestinal diseases in FinnGen and UK Biobank

**Supplementary Table 7**. The associations of genetic liability to type 2 diabetes with gastrointestinal diseases in FinnGen, UK Biobank and other large consortia when excluded BMI-related SNPs from instrumental variants for type 2 diabetes

**Supplementary Table 8**. The associations of genetic liability to type 2 diabetes with gastrointestinal diseases in FinnGen, UK Biobank and other large consortia in multivariable analyses adjusting for body mass index

**Supplementary Table 9**. The associations of genetic liability to type 2 diabetes with gastrointestinal diseases in FinnGen, UK Biobank after removing SNPs associated with gastrointestinal diseases at the loci significance level or using SNPs from population without UK Biobank participants

**Supplementary Table 10.** The associations of genetically predicted levels of glycemic traits with gastrointestinal diseases in FinnGen, UK Biobank and other large consortia

**Supplementary Table 11.** Sensitivity analyses for the associations of genetically predicted fasting insulin levels with gastrointestinal diseases in FinnGen and UK Biobank

**Supplementary Table 12.** Sensitivity analyses for the associations of genetically predicted fasting glucose levels with gastrointestinal diseases in FinnGen and UK Biobank

**Supplementary Table 13.** Sensitivity analyses for the associations of genetically predicted HbA1c levels with gastrointestinal diseases in FinnGen and UK Biobank

All tables can be obtained in OSF data respiratory:

https://osf.io/usvr5/?view_only=f0adc75341db4c4691f333c4db635154

Please view the file by clicking the xlsx file.


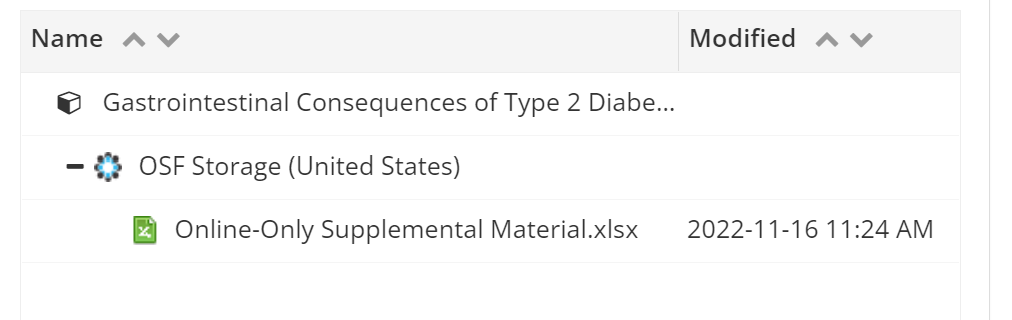

Supplement: Supplementary file 1 [file 38890812]
